# Supplementary material for: Graphene-sustained bipolar covalent organic framework for symmetric supercapacitors and capacitive deionization systems with superior performance
Source: Royal Society of Chemistry journal article supplement (doi:10.1039/d4ta06293k), 2024-01-01
Supplement: d4ta06293k1.pdf [file d4ta06293k1.pdf]

## Supporting Information

### Graphene-sustained Bipolar Covalent Organic Framework for Symmetric Supercapacitors and Capacitive Deionization with Superior Performance

Liming Xu,<sup>a</sup> Yong Liu,<sup>b\*</sup> Yuquan Li,<sup>c</sup> Xiaoyang Xuan<sup>d\*</sup>, Xingtao Xu,<sup>e</sup> Zhiwei Gong<sup>a</sup> and Likun Pan

<sup>a\*</sup>

<sup>a</sup> *Shanghai Key Laboratory of Magnetic Resonance, School of Physics and Electronic Science, East China Normal University, Shanghai 200241, China*

<sup>b</sup> *School of Materials Science and Engineering, Qingdao University of Science and Technology, Qingdao, Shandong 266042, China*

<sup>c</sup> *College of Environmental Science and Engineering, Yangzhou University, Yangzhou, Jiangsu 225127, China*

<sup>d</sup> *College of Chemistry and Chemical Engineering, Taishan University, Taian, Shandong 271000, China*

<sup>e</sup> *Marine Science and Technology College, Zhejiang Ocean University, Zhoushan, Zhejiang 316022, China*

*\*Corresponding authors*

Email: [lkpan@phy.ecnu.edu.cn](mailto:lkpan@phy.ecnu.edu.cn) (Likun Pan); [yong.liu@qust.edu.cn](mailto:yong.liu@qust.edu.cn) (Yong Liu); [xyxuan@tsu.edu.cn](mailto:xyxuan@tsu.edu.cn) (Xiaoyang Xuan)

## Materials

Dipyrzino[2,3-f:2',3'-h]quinoxaline-2,3,6,7,10,11-hexacarbonitrile (DQH, 95%) and benzene-1,2,4,5-tetraamine tetrahydrochloride (BA, 97%) were purchased from Bide Pharmatech Ltd. Sodium carbonate ( $\text{Na}_2\text{CO}_3$ ,  $\geq 99.8\%$ ), sulfuric acid ( $\text{H}_2\text{SO}_4$ , 95.0~98.0%), polyvinylidene fluoride (PVDF,  $\geq 99.5\%$ ), 1-methyl-2-pyrrolidone (NMP,  $\geq 99.5\%$ ), and sodium chloride ( $\text{NaCl}$ ,  $\geq 99.5\%$ ) were purchased from Sinopharm Chemical Reagent Co., Ltd (Shanghai, China). AC (4~7  $\mu\text{m}$ ) was purchased from Kuraray (Shanghai) Co., Ltd. All the chemicals were used without further purification.

## Structural characterizations

Scanning electron microscopy (SEM) was performed on a Hitachi S-4800 electron microscope. Transmission electron microscopy (TEM) and high-resolution TEM (HR-TEM) images were taken using JEM 2010 JEOL. X-ray diffraction (XRD) patterns of the samples were recorded on a Panalytical PRO PW3040/60 diffractometer at room temperature using Cu-K $\alpha$  radiation ( $\lambda = 1.54056 \text{ \AA}$ ) in the  $2\theta$  range of 5~70°. The structure was examined by solid-state  $^{13}\text{C}$  NMR with Bruker AVANCE III HD 400MHz. Fourier transform infrared spectra (FT-IR) were recorded in the range 400~4000  $\text{cm}^{-1}$  on a Nicolet iS-50 FT-IR spectrometer with KBr pellets. High-resolution XPS spectra were collected using a Thermo ESCALAB 250XI X-ray photoelectron spectroscopy (XPS).  $\text{N}_2$  adsorption/desorption tests were performed on an Autosorb iQ analyzer. The pore size distribution was derived from the adsorption branch using the Barret-Joyner-Halenda (BJH) method. The transmittance spectra were recorded by using UV-vis spectrophotometers (Shimadzu UV-3600).

## Preparation of working electrode

80 wt.% active material, 10 wt.% Super P (conductive agent) and 10 wt.% polyvinylidene fluoride (binder) were mixed in 1-methyl-2-pyrrolidone to form a homogeneous slurry. Then, the slurry was uniformly cast on graphite substrates (~4  $\text{cm}^2$  for the three-electrode system and ~32  $\text{cm}^2$  for the CDI cell). Finally, the working electrode was dried at 80 °C under vacuum conditions overnight. For the electrochemical and desalination tests, the mass loading of active material on the working electrode was about 4 mg and 60 mg, respectively.

## Electrochemical characterizations

Cyclic voltammetry (CV), galvanostatic charge-discharge (GCD), and electrochemical impedance spectroscopy (EIS) tests were conducted using a CHI660E electrochemical analyzer (Shanghai, China) in a 1 M NaCl solution. In the three-electrode system, the Ag/AgCl electrode and

platinum mesh served as reference and counter electrodes, respectively.

### Electrochemical calculation

For the three-electrode system, the specific capacitance ( $C_{S1}$ , F g<sup>-1</sup>) of the material was calculated from CV curves according to the following formula:

$$C_{S1} = \frac{\int_{E_1}^{E_2} i(E) d(E)}{2mv(E_2 - E_1)} \quad (S1)$$

where  $E_1$  and  $E_2$  are the cutoff potentials in CV,  $i(E)$  is the instantaneous current,  $i(E)d(E)$  is the total voltammetric charge obtained by integration of the positive and negative sweeps in the CV,  $v$  is the scan rate, and  $m$  is the mass of the individual sample. The specific capacitance ( $C_{S2}$ , F g<sup>-1</sup>) was calculated from the GCD curves according to the following equation:

$$C_{S2} = \frac{I * \Delta t}{m * \Delta V} \quad (S2)$$

where  $I$ ,  $\Delta t$ ,  $m$ , and  $\Delta V$ , refer to the current (A), discharge time (s), mass of active material (g), and potential window (V), respectively. The areal capacitance ( $C_{areal}$ , mF cm<sup>-2</sup>) was calculated according to the following equation:

$$C_{areal} = \frac{C_{S2} * m}{A} \quad (S3)$$

where  $A$  is the area (cm<sup>2</sup>) of the electrode.

The relaxation time constant ( $\tau_0$ , s), real capacitance ( $C_{re}(\omega)$ , F), imaginary capacitance ( $C_{im}(\omega)$ , F), diffusion resistance ( $\sigma$ ,  $\Omega$  s<sup>-0.5</sup>), and ion diffusion coefficient ( $D$ , cm<sup>2</sup> s<sup>-1</sup>) were analyzed with EIS based on the following equation:

$$\tau_0 = \frac{1}{f_0} \quad (S4)$$

$$C(\omega) = C_{re}(\omega) - jC_{im}(\omega) \quad (S5)$$

$$C_{re}(\omega) = \frac{-Z_{im}}{2\pi f(Z_{re}^2 + Z_{im}^2)} \quad (S6)$$

$$C_{im}(\omega) = \frac{Z_{re}}{2\pi f(Z_{re}^2 + Z_{im}^2)} \quad (S7)$$

$$Z_{re} = \sigma(2\pi f)^{-0.5} + R_s + R_{ct} \quad (S8)$$

$$D = \frac{R^2 T^2}{2A^2 C^2 n^4 F^4 \sigma^2} \quad (S9)$$

where  $f_0$ ,  $Z_{re}$ ,  $Z_{im}$ ,  $f$ ,  $R_s$ ,  $R_{ct}$ ,  $R$ ,  $T$ ,  $A$ ,  $C$ ,  $n$ , and  $F$  refer to the frequency at 45° phase angle, the real impedance ( $\Omega$ ), the imaginary impedance ( $\Omega$ ), frequency (Hz), ohmic resistance ( $\Omega$ ), charge transfer resistance ( $\Omega$ ), gas constant (8.314 J mol<sup>-1</sup> K<sup>-1</sup>), Kelvin temperature (293.15 K), the surface area of the electrode (cm<sup>2</sup>), the molar concentration of electrolyte (mol L<sup>-1</sup>), electron transfer numbers per molecule during electron reaction, and Faraday constant (96,485 C mol<sup>-1</sup>), respectively.

For the two-electrode system, the gravimetric capacitance ( $C_{S3}$ , F g<sup>-1</sup>) was calculated by the following formula:

$$C_{S3} = \frac{I * \Delta t}{m * \Delta V} \quad (S10)$$

where  $I$ ,  $\Delta V$ ,  $\Delta t$ , and  $m$ , are the discharge current (A), the voltage window (V), the discharge time (s), and the total mass (g) of the active material of two electrodes, respectively. The energy density ( $E$ , Wh kg<sup>-1</sup>) and power density ( $P$ , W kg<sup>-1</sup>) were calculated by the following two equations:

$$E = \frac{C_{S3} * \Delta V^2}{2 * 3.6} \quad (S11)$$

$$P = \frac{3600 * E}{\Delta t} \quad (S12)$$

where  $C_{S3}$ ,  $\Delta t$ , and  $\Delta V$  are specific capacitances (F g<sup>-1</sup>), discharge time (s), and voltage window (V).

### Salt removal tests

All salt removal experiments were conducted in a batch-mode CDI system using the constant current mode. A peristaltic pump (volume: 70 mL, flow rate: 100 mL min<sup>-1</sup>, temperature: room temperature) continuously circulated the NaCl solution through the CDI device. The concentration of the effluent from the pump was recorded in real time by an ion conductivity meter (DDSJ-308A, Precision & Scientific Instrument). The working electrode in the CDI system comprises symmetrical DQHBA or DQHBArGO electrodes separated by a spacer and anion/cation-exchange membrane. The

salt removal experiments were performed in NaCl solutions with various initial concentrations (100, 200, 300, 500, 1000 mg L<sup>-1</sup>) at  $\pm 1.8$  V. Additionally, different current densities (100, 200, 300, 400, 500 mA g<sup>-1</sup>) were tested in a 500 mg L<sup>-1</sup> NaCl solution. Our previous work established the relationship between the conductivity of NaCl solutions and their concentrations.<sup>1</sup>

### Salt removal calculation

The salt removal capacity (SAC, mg g<sup>-1</sup>), mean desalination rate (MSAR, mg g<sup>-1</sup> min<sup>-1</sup>), and charge efficiency ( $\Lambda$ ) were defined as follows:

$$\text{SAC} = \frac{(C_0 - C_e) * V}{m} \quad (\text{S13})$$

$$\text{MSAR} = \frac{\text{SAC}}{t} \quad (\text{S14})$$

$$\Lambda = \frac{(C_0 - C_e) * V * F}{1000 * M * Q} * 100\% \quad (\text{S15})$$

where  $C_0$  and  $C_e$  are the initial and final NaCl concentrations (mg L<sup>-1</sup>),  $V$  is the volume of NaCl solution (L),  $m$  is the mass of the active materials (g),  $t$  (s) is the charge time,  $F$  is the Faraday constant (96,485 C mol<sup>-1</sup>),  $M$  (58.44 g mol<sup>-1</sup>) is the relative molar mass of NaCl, and  $Q$  (charge, C) is the total charge.

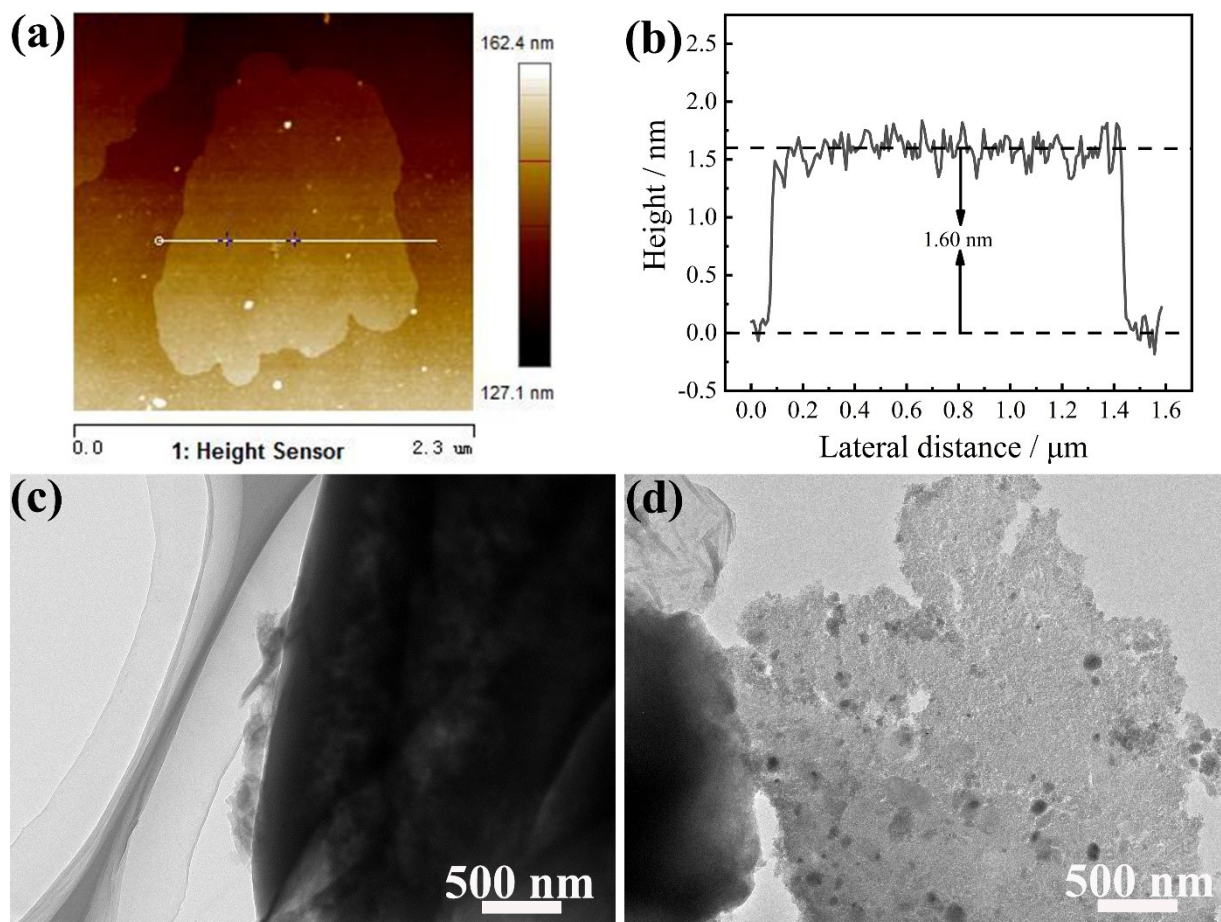

**Fig. S1.** (a) AFM image and (b) size of GO. TEM images of (c) DQHBA and (d) DQHBArGO-75.

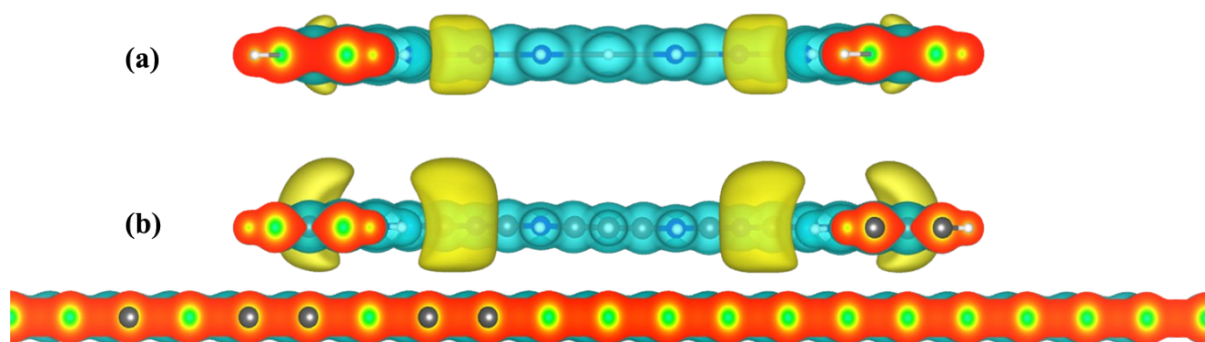

**Fig. S2.** Parallel views of the deformation charge density image of (a) DQHBA and (b) DQHBArGO-75.

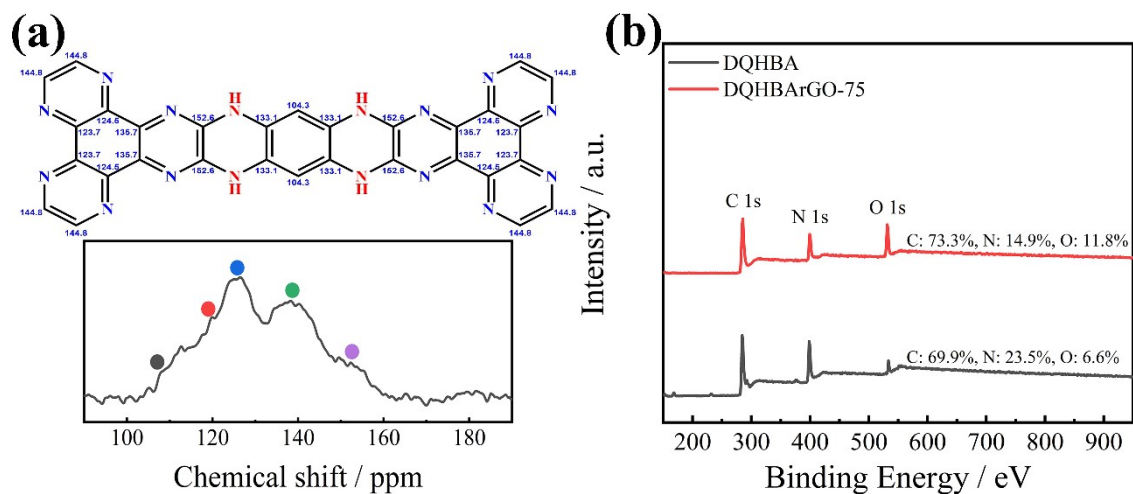

**Fig. S3.** (a)  $^{13}\text{C}$  solid-state NMR of DQHBA. (b) XPS survey spectra of DQHBA and DQHBArGO-75.



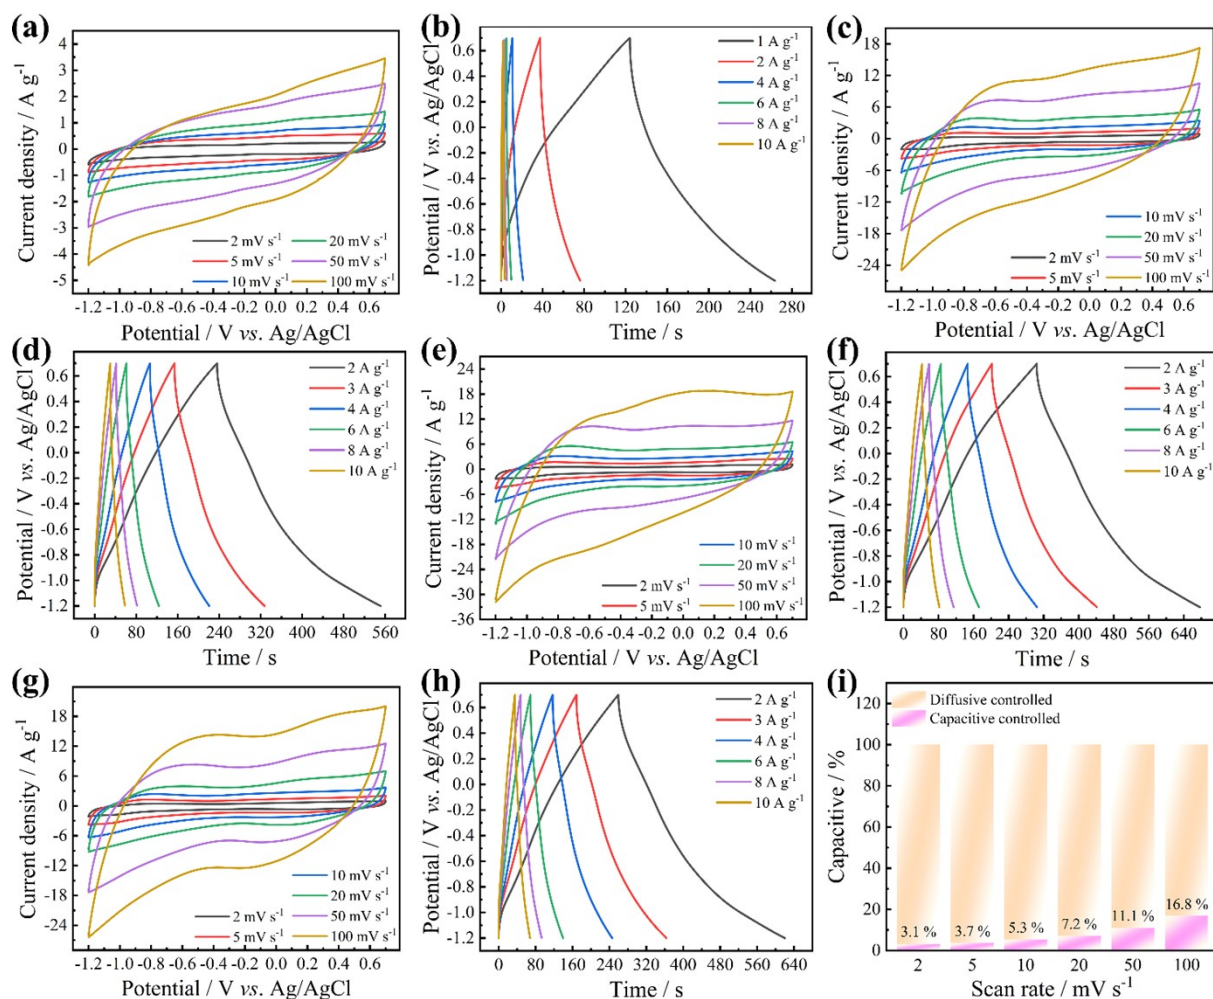

**Fig. S4.** Electrochemical performances of (a, b) DQHBA, (c, d) DQHBArGO-50, (e, f) DQHBArGO-75, and (g, h) DQHBArGO-100. (i) Percentages of capacitive and diffusion contributions of DQHBA.

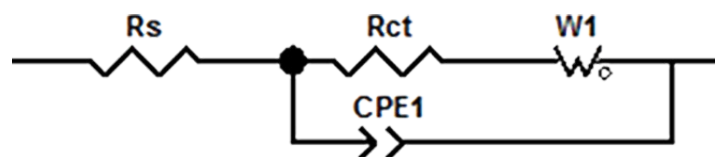

**Fig. S5.** Equivalent circuit diagram.

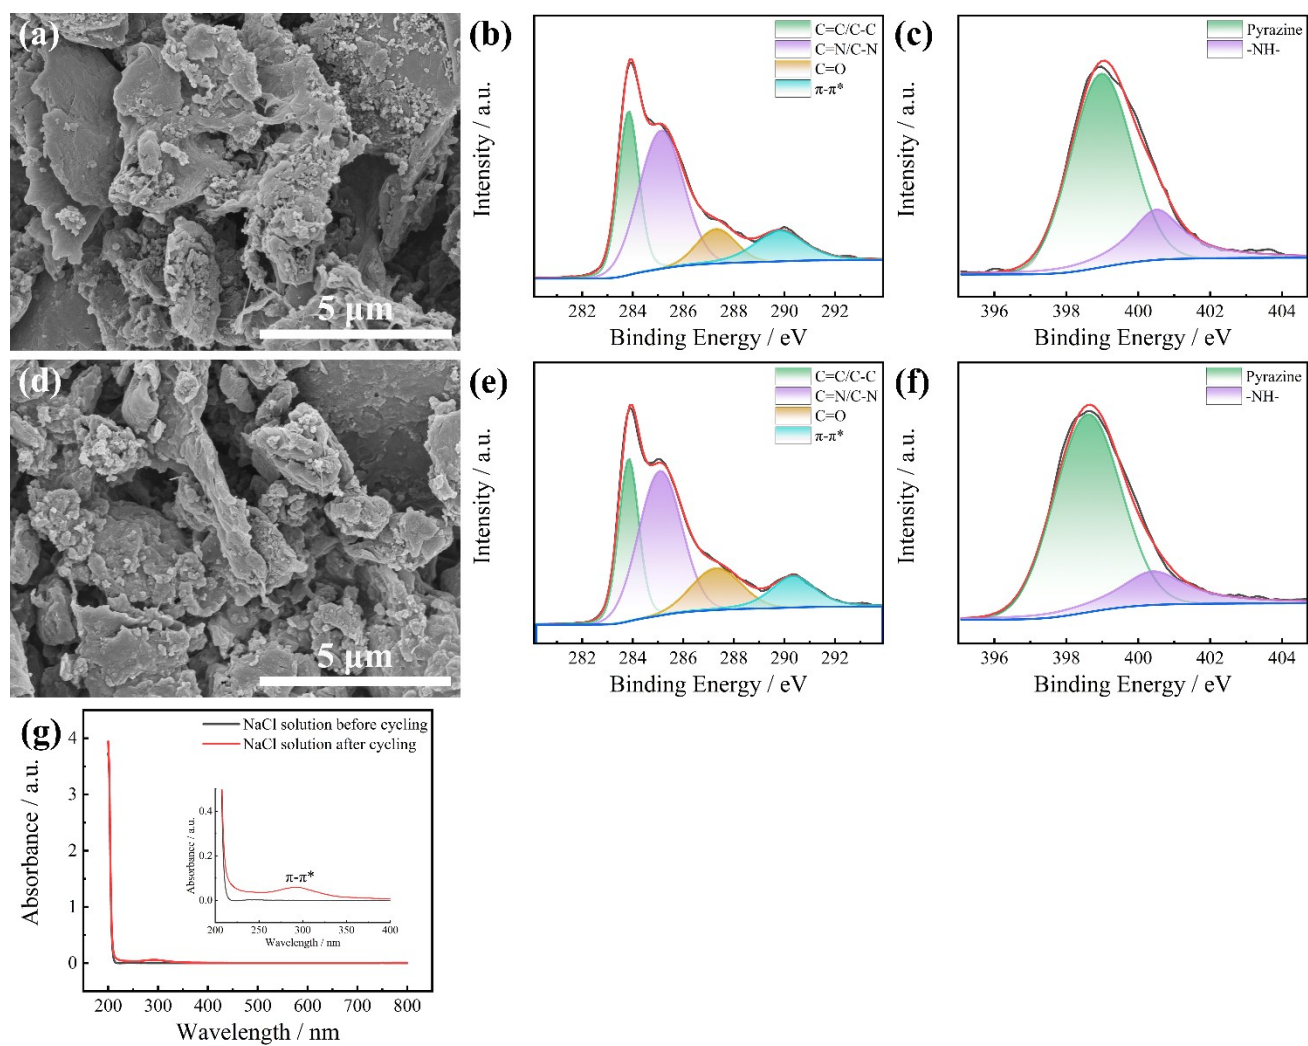

**Fig. S6.** (a, d) SEM images, high-resolution XPS (b, e) C1s and (c, f) N 1s spectra of the working electrode before and after cycling. (g) The UV-visible absorption spectra of the electrolyte before and after cycling.

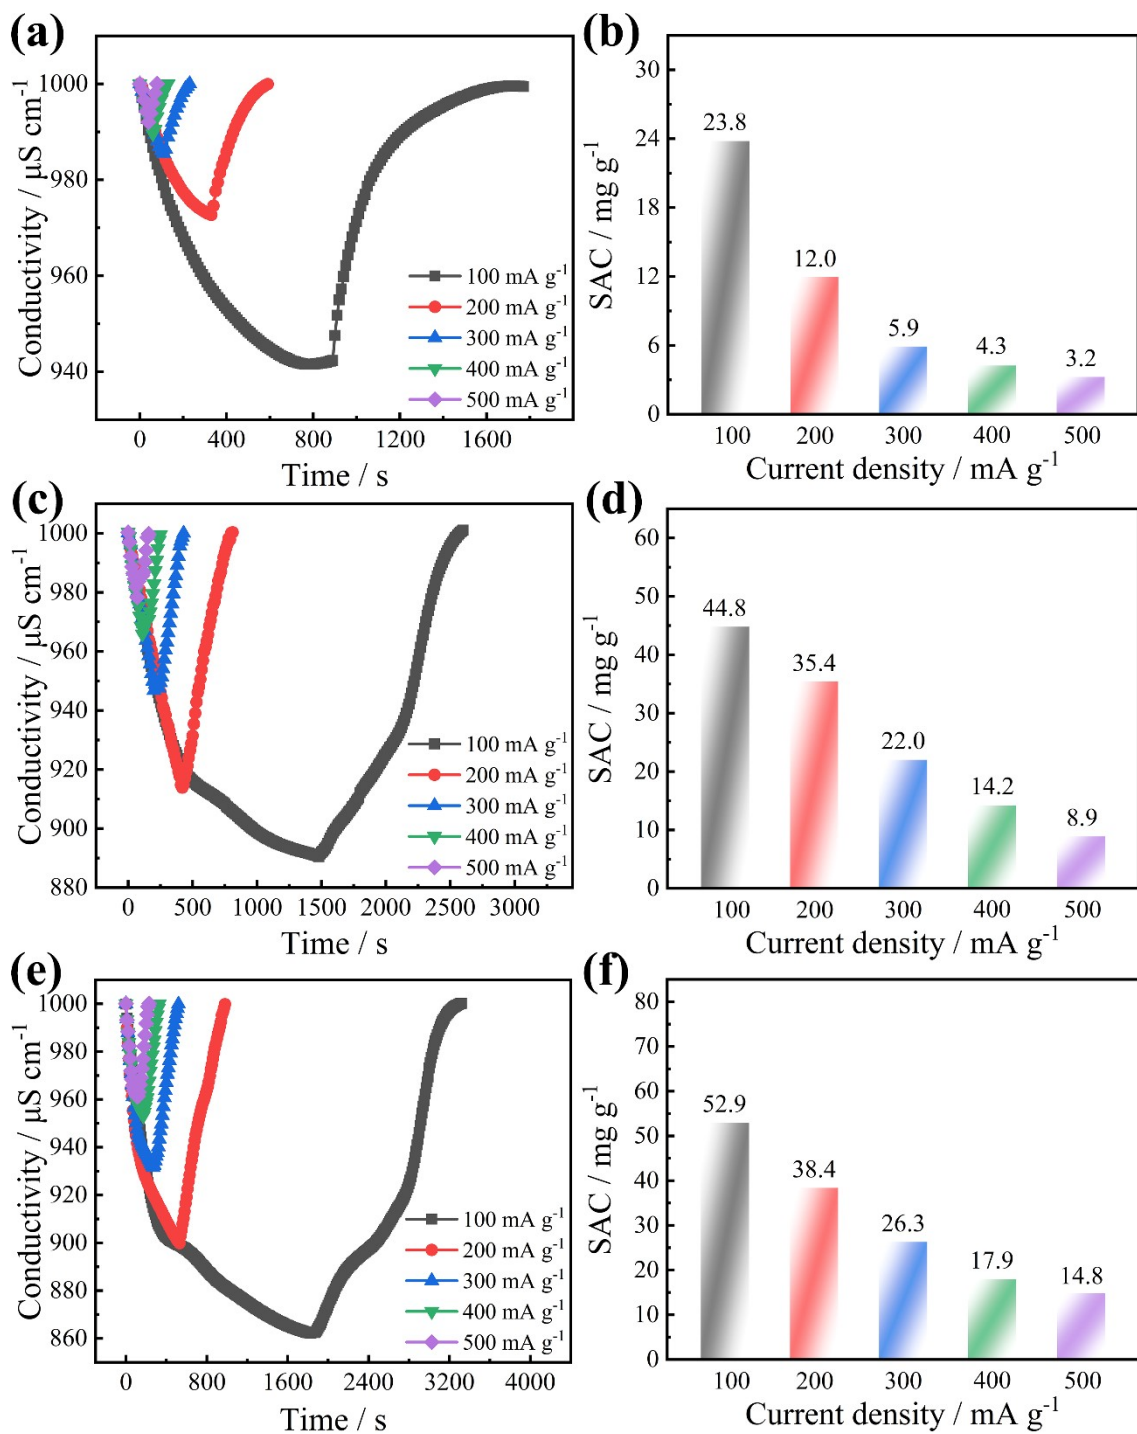

**Fig. S7.** Conductivity and SAC versus current density of (a, b) DQHBA, (c, d) DQHBArGO-50, and (e, f) DQHBArGO-100.

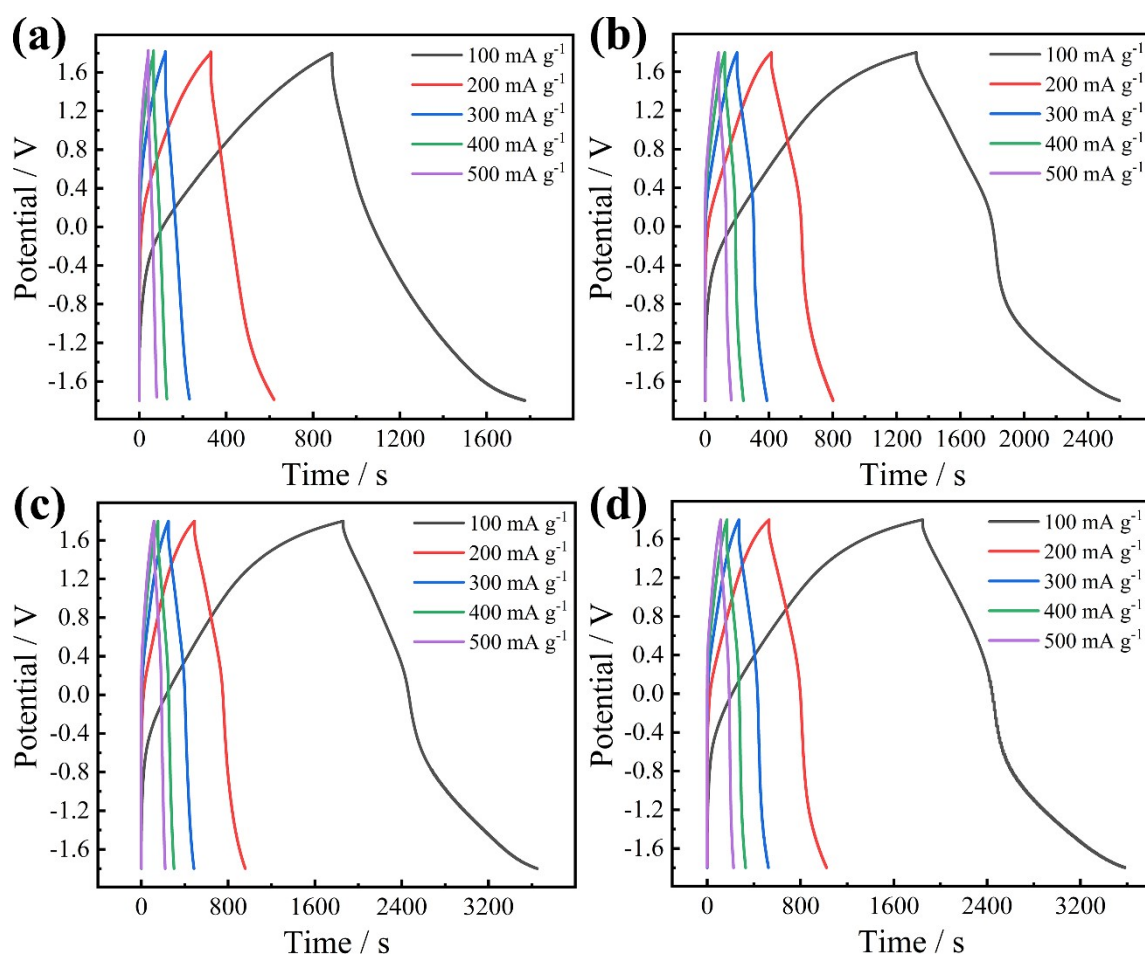

**Fig. S8.** Voltage response curves of (a) DQHBA, (b) DQHBArGO-50, (c) DQHBArGO-75, and (d) DQHBArGO-100 CDI at various current densities.

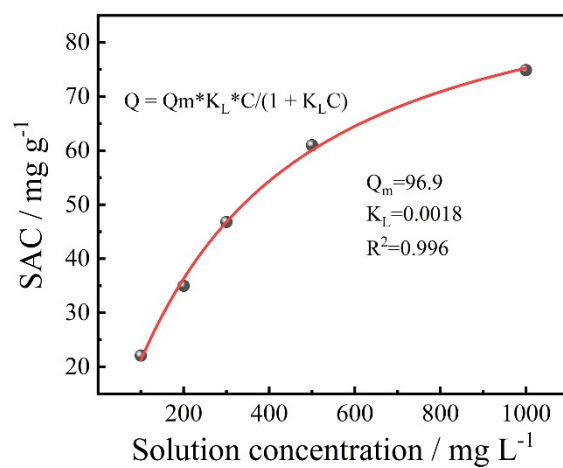

**Fig. S9.** Desalination capacity of DQHBArGO-75 with different feed concentrations and the corresponding Langmuir isotherm fitted curve.

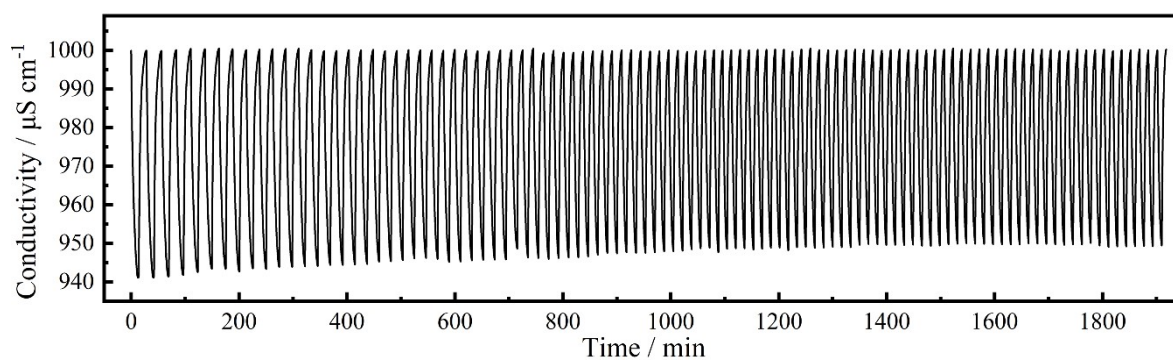

**Fig. S10.** Cyclic performance of DQHBA.

**Table S1.** The specific capacitances of DQHBArGO-75 and previously reported polymer-based electrode materials.

| Material                                                         | Voltage<br>Window /V | Electrolyte                          | Specific<br>capacitance /F g <sup>-1</sup> | Ref.             |
|------------------------------------------------------------------|----------------------|--------------------------------------|--------------------------------------------|------------------|
| Ni-TAPP/rGO                                                      | 1.0                  | 6 M KOH                              | 367.5                                      | S2               |
| DPP-TBB-COF                                                      | 0.5                  | 1 M KOH                              | 384                                        | S3               |
| a-GO@COF-Fs                                                      | 1.3                  | 1 M H <sub>2</sub> SO <sub>4</sub>   | 295                                        | S4               |
| Arylamine-Linked 2D COF                                          | 1.1                  | 1 M H <sub>2</sub> SO <sub>4</sub>   | 271                                        | S5               |
| Triphenylamine-based COF                                         | 1.0                  | 1 M H <sub>2</sub> SO <sub>4</sub>   | 263.1                                      | S6               |
| Ti <sub>3</sub> C <sub>2</sub> T <sub>x</sub> MXene-polydopamine | 1.5                  | 1 M NaCl                             | 112                                        | S7               |
| Dimethoxybenzene-dithiophene-<br>based COF                       | 1.0                  | 1 M KOH                              | 273.3                                      | S8               |
| TpPa-(OH) <sub>2</sub> /rGO                                      | 0.8                  | 1 M H <sub>2</sub> SO <sub>4</sub>   | 371.1                                      | S9               |
| Tetrathiafulvalene-based COF                                     | 3.5                  | EMIMBF <sub>4</sub>                  | 130                                        | S10              |
| COF/MXene                                                        | 0.7                  | 2 M HCl                              | 390                                        | S11              |
| Carbon-based elastic foams<br>supported COF                      | 1.0                  | 1 M H <sub>2</sub> SO <sub>4</sub>   | 129.2                                      | S12              |
| Triazine-based COF                                               | 2.0                  | 0.5 M K <sub>2</sub> SO <sub>4</sub> | 182.6                                      | S13              |
| DAAQ-COFs/GA                                                     | 1.0                  | 1 M H <sub>2</sub> SO <sub>4</sub>   | 378                                        | S14              |
| v-COF-GAs                                                        | 0.8                  | 1 M H <sub>2</sub> SO <sub>4</sub>   | 289                                        | S15              |
| rGO/COF-20                                                       | 1.0                  | 1 M H <sub>2</sub> SO <sub>4</sub>   | 321                                        | S16              |
| DQHBArGO-75                                                      | 1.9                  | 1 M NaCl                             | 397.9                                      | <b>This work</b> |



**Table S2.** Diffusion resistance and Na<sup>+</sup> and Cl<sup>-</sup> diffusion coefficient of DQHBA, DQHBArGO-50, DQHBArGO-75, and DQHBArGO-100 during the electrochemical process.

| <b>Material</b> | <b>Diffusion<br/>resistance /<math>\Omega</math> s<sup>-0.5</sup></b> | <b>Na<sup>+</sup> diffusion<br/>coefficient (cm<sup>2</sup> s<sup>-1</sup>)</b> | <b>Cl<sup>-</sup> diffusion<br/>coefficient (cm<sup>2</sup> s<sup>-1</sup>)</b> |
|-----------------|-----------------------------------------------------------------------|---------------------------------------------------------------------------------|---------------------------------------------------------------------------------|
| DQHBA           | 17.88                                                                 | 8.27*10 <sup>-14</sup>                                                          | 2.62*10 <sup>-14</sup>                                                          |
| DQHBArGO-50     | 3.24                                                                  | 2.00*10 <sup>-12</sup>                                                          | 6.33*10 <sup>-13</sup>                                                          |
| DQHBArGO-75     | 1.60                                                                  | 1.03*10 <sup>-11</sup>                                                          | 3.26*10 <sup>-12</sup>                                                          |
| DQHBArGO-100    | 2.26                                                                  | 5.22*10 <sup>-12</sup>                                                          | 1.65*10 <sup>-12</sup>                                                          |

## References

1. H.B. Li, T. Lu, L.K. Pan, Y.P. Zhang, Z. Sun, *J. Mater. Chem.*, 2009, **19**, 6773-6779.
2. A.Q. Zhang, P. Ran, X. Han, S.W. Ke, A.Q. Qiu, Z.D. Zhang, Y. Lv, M.N. Ding, J.L. Zuo, *J. Mater. Chem. A*, 2024, **12**, 22037-22044.
3. L. Luo, C.B. Li, Y.C. Wang, P.Y. Chen, Z.Q. Zhou, T.W. Chen, K.L. Wu, S.Y. Ding, L.X. Tan, J.G. Wang, X.F. Shao, Z.T. Liu, *Small*, 2024, **20**, 2402993.
4. D. Cui, W. Xie, S.R. Zhang, Y.H. Xu, Z.M. Su, *Polym. Chem.*, 2023, **14**, 803-810.
5. Z.F. Yang, J.J. Liu, Y.S. Li, G. Zhang, G.L. Xing, L. Chen, *Angew. Chem. Int. Ed.*, 2021, **60**, 20754-20759.
6. S.X. Xiong, J. Liu, Y.C. Wang, X.Q. Wang, J. Chu, R.L. Zhang, M. Gong, B.H. Wu, *J. Appl. Polym. Sci.*, 2022, **139**, e51510.
7. Q. Li, X.T. Xu, J.R. Guo, J.P. Hill, H.S. Xu, L.X. Xiang, C. Li, Y. Yamauchi, Y.Y. Mai, *Angew. Chem. Int. Ed.*, 2021, **60**, 26528-26534.
8. S. Li, B. Kumbhakar, B. Mishra, J. Roeser, N. Chaoui, J. Schmidt, A. Thomas, P. Pachfule, *ACS Appl. Energy Mater.*, 2023, **6**, 9256-9263.
9. D.P. Hu, Y.H. Jia, S.P. Yang, C.Q. Lin, F.Y. Huang, R.H. Wu, S.M. Guo, K.F. Xie, P.C. Du, *Chem. Eng. J.*, 2024, **488**, 151160.
10. A. Chatterjee, J.M. Sun, K.S. Rawat, V.V. Speybroeck, P.V.D. Voort, *Small*, 2023, **19**, 2303189.
11. N. An, Z. Guo, C. Guo, M.Q. Wei, D.M. Sun, Y.Y. He, W.L. Li, L. Zhou, Z.G. Hu, X.Y. Dong, *Chem. Eng. J.*, 2023, **458**, 141434.
12. Y.Y. Dong, Y.L. Wang, X.F. Zhang, Q. Lai, Y.K. Yang, *Chem. Eng. J.*, 2022, **449**, 137858.
13. Y. Kumar, I. Ahmad, A. Rawat, R.K. Pandey, P. Mohanty, R. Pandey, *ACS Appl. Mater. Interfaces*, 2024, **16**, 11605-11616.
14. N. An, Z. Guo, J. Xin, Y.Y. He, K.F. Xie, D.M. Sun, X.Y. Dong, Z.G. Hu, *J. Mater. Chem. A*, 2021, **9**, 16824-16833.
15. Y.Q. Jiang, Z.Y. Zhang, D. Chen, J.G. Du, Y.H. Yang, S. Wang, F. Guo, X.Y. Chen, C. Gao, W.J. Wang, P.W. Liu, *Adv. Mater.*, 2022, **34**, 2204250.
16. C.J. Wang, F. Liu, J.S. Chen, Z.W. Yuan, C. Liu, X.S. Zhang, M.Y. Xu, L. Wei, Y. Chen, *Energy Storage Mater.*, 2020, **32**, 448-457.
